# Supplementary material for: Continuous Versus Intermittent Vital Signs Monitoring Using a Wearable, Wireless Patch in Patients Admitted to Surgical Wards: Pilot Cluster Randomized Controlled Trial
Source: PubMed Central journal article supplement (PMC6305881; doi:10.2196/10802), 2018-12-11
Supplement: jmir_v20i12e10802_app3.pdf [file jmir_v20i12e10802_app3.pdf]

## Supplementary material

|                                                                                                                                                                                                                                                                                                                                         | <b>SensiumVitals® +NEWS</b><br>(n=140) | <b>NEWS alone</b><br>(n=86) |
|-----------------------------------------------------------------------------------------------------------------------------------------------------------------------------------------------------------------------------------------------------------------------------------------------------------------------------------------|----------------------------------------|-----------------------------|
| Number of patients with complications (all <sup>a</sup> )                                                                                                                                                                                                                                                                               | 100 (71.4%)                            | 57 (66.3%)                  |
| Anastomotic leak                                                                                                                                                                                                                                                                                                                        | 1                                      | 1                           |
| Bowels not opened                                                                                                                                                                                                                                                                                                                       | 7                                      | 5                           |
| Chest pain                                                                                                                                                                                                                                                                                                                              | 3                                      | 2                           |
| Confusion                                                                                                                                                                                                                                                                                                                               | 3                                      | 1                           |
| Electrolyte disturbance                                                                                                                                                                                                                                                                                                                 | 8                                      | 2                           |
| Increased stoma output                                                                                                                                                                                                                                                                                                                  | 1                                      | 2                           |
| Loose stools                                                                                                                                                                                                                                                                                                                            | 3                                      | 0                           |
| Nausea and vomiting                                                                                                                                                                                                                                                                                                                     | 10                                     | 8                           |
| Pain                                                                                                                                                                                                                                                                                                                                    | 4                                      | 5                           |
| Pyrexia                                                                                                                                                                                                                                                                                                                                 | 5                                      | 1                           |
| Sepsis                                                                                                                                                                                                                                                                                                                                  | 24                                     | 12                          |
| Rectal bleeding                                                                                                                                                                                                                                                                                                                         | 1                                      | 2                           |
| Respiratory complication                                                                                                                                                                                                                                                                                                                | 3                                      | 4                           |
| Stroke                                                                                                                                                                                                                                                                                                                                  | 1                                      | 0                           |
| Urinary tract infection                                                                                                                                                                                                                                                                                                                 | 5                                      | 2                           |
| Wound complication                                                                                                                                                                                                                                                                                                                      | 3                                      | 3                           |
| Other                                                                                                                                                                                                                                                                                                                                   | 18                                     | 7                           |
| Number of patients with major complications (Clavien-Dindo >2 <sup>b</sup> )                                                                                                                                                                                                                                                            | 8 (5.7%)                               | 5 (5.8%)                    |
| Sepsis events                                                                                                                                                                                                                                                                                                                           | 24 (17.1%)                             | 12 (14.0%)                  |
| <i>Intra-abdominal collection</i>                                                                                                                                                                                                                                                                                                       | 4                                      | 0                           |
| <i>Ischaemic bowel</i>                                                                                                                                                                                                                                                                                                                  | 1                                      | 0                           |
| <i>Venous access infection</i>                                                                                                                                                                                                                                                                                                          | 1                                      | 1                           |
| <i>Respiratory tract infection</i>                                                                                                                                                                                                                                                                                                      | 3                                      | 3                           |
| <i>Urinary tract infection</i>                                                                                                                                                                                                                                                                                                          | 2                                      | 1                           |
| <i>Wound infection</i>                                                                                                                                                                                                                                                                                                                  | 5                                      | 2                           |
| <i>Unknown source</i>                                                                                                                                                                                                                                                                                                                   | 7                                      | 4                           |
| <i>Other</i>                                                                                                                                                                                                                                                                                                                            | 1                                      | 1                           |
| <sup>a</sup> All complications includes any deviations from the normal post-operative course, from minor (such as nausea) to major (such as death).<br><sup>b</sup> A Clavien-Dindo score >2 indicates that that the complication required critical care admission or further surgical/radiological intervention, or resulted in death. |                                        |                             |

Complication rates between intervention and control arms

|                                                                | <b>SensiumVitals +NEWS</b><br>(n=140) | <b>NEWS alone: incl non-randomised bays</b><br>(n=210) | <b>NEWS alone: only randomised bays</b><br>(n=86) |
|----------------------------------------------------------------|---------------------------------------|--------------------------------------------------------|---------------------------------------------------|
| Males                                                          | 76 (54.3%)                            | 77 (36.7%)                                             | 39 (45.4%)                                        |
| Females                                                        | 64 (45.7%)                            | 133 (63.3%)                                            | 47 (54.6%)                                        |
| Age                                                            |                                       |                                                        |                                                   |
| Mean                                                           | 65.2 years                            | 60.5 years                                             | 63.7 years                                        |
| Range                                                          | 24-94 years                           | 19-93 years                                            | 21-92 years                                       |
| ASA                                                            |                                       |                                                        |                                                   |
| 1                                                              | 9 (6.4%)                              | 19 (9.0%)                                              | 9 (10.5%)                                         |
| 2                                                              | 62 (44.3%)                            | 97 (46.2%)                                             | 35 (40.7%)                                        |
| 3                                                              | 42 (30.0%)                            | 50 (23.8%)                                             | 22 (25.6%)                                        |
| 4                                                              | 3 (2.1%)                              | 5 (2.4%)                                               | 3 (3.5%)                                          |
| Not documented                                                 | 24 (17.1%)                            | 39 (18.6%)                                             | 17(19.8%)                                         |
| Emergency admissions                                           | 70 (50%)                              | 113 (53.8%)                                            | 44 (51.2%)                                        |
| Elective admissions                                            | 70 (50%)                              | 97 (46.2%)                                             | 42 (48.8%)                                        |
| Surgical intervention                                          | 103 (73.6%)                           | 154 (73.3%)                                            | 62 (72.1%)                                        |
| Medical outliers                                               | 19 (13.6%)                            | 27 (12.9%)                                             | 14 (16.3%)                                        |
| Number of complications (all <sup>a</sup> )                    | 102 (72.9%)                           | 143 (68.1%)                                            | 57 (66.3%)                                        |
| Number of major complications (Clavien-Dindo >2 <sup>b</sup> ) | 8 (5.7%)                              | 17 (8.1%)                                              | 5 (5.8%)                                          |
| Sepsis events                                                  | 24 (17.1%)                            | 33 (15.7%)                                             | 12 (14.0%)                                        |
| Time to antibiotics in cases of sepsis                         | n=22                                  | n=32                                                   | n=12                                              |
| Mean                                                           | 626.0 minutes                         | 900.0 minutes                                          | 1012.8 minutes                                    |
| 95% confidence interval                                        | 431.7-820.3                           | 621.6-1178.4                                           | 95% CI 425.0-1600.6                               |
| Level II/III admissions                                        | 3 (2.1%)                              | 5 (2.4%)                                               | 2 (2.3%)                                          |
| 95% confidence interval                                        | 0%-4.54%                              | 0.319%-4.44%                                           | 0%-5.51%                                          |
| Length of stay in hospital                                     |                                       |                                                        |                                                   |
| Mean                                                           | 13.3 days                             | 15.5 days                                              | 14.6 days                                         |

|                                                                                                                                                                                                                                                                                                                                                                                                    |                         |             |             |             |
|----------------------------------------------------------------------------------------------------------------------------------------------------------------------------------------------------------------------------------------------------------------------------------------------------------------------------------------------------------------------------------------------------|-------------------------|-------------|-------------|-------------|
|                                                                                                                                                                                                                                                                                                                                                                                                    |                         |             |             |             |
|                                                                                                                                                                                                                                                                                                                                                                                                    | 95% confidence interval | 11.3-15.3   | 10.1-20.9   | 11.5-17.7   |
|                                                                                                                                                                                                                                                                                                                                                                                                    | Readmissions            | 16 (11.4%)  | 38 (18.1%)  | 18 (20.9%)  |
|                                                                                                                                                                                                                                                                                                                                                                                                    | 95% confidence interval | 6.16%-16.7% | 12.9%-23.3% | 12.3%-29.5% |
|                                                                                                                                                                                                                                                                                                                                                                                                    | Inpatient deaths        | 1 (0.7%)    | 0 (0%)      | 0 (0%)      |
| <p><sup>a</sup> All complications include any deviations from the normal post-operative course, from minor (such as nausea) to major (such as death).</p> <p><sup>b</sup> Clavien-Dindo is a scale for the severity of complications. A Clavien-Dindo score &gt;2 indicates that that the complication required critical care admission or a further surgical procedure, or resulted in death.</p> |                         |             |             |             |

Summary of outcome measures including exploratory analysis

| Statement                                                            | Strongly Agree | Agree | Neutral | Disagree | Strongly Disagree |
|----------------------------------------------------------------------|----------------|-------|---------|----------|-------------------|
| <b>Comfort</b>                                                       |                |       |         |          |                   |
| The SensiumVitals® Patch was comfortable to wear.                    |                |       |         |          |                   |
| <b>Quality of Care</b>                                               |                |       |         |          |                   |
| I felt safer because my vital signs were being monitored constantly. |                |       |         |          |                   |
| <p><b>We welcome any additional comments you may have:</b></p>       |                |       |         |          |                   |

Patient questionnaire
